# Supplementary material for: Family Support in Prevention Programs for Children at Risk for Emotional/Behavioral Problems
Source: Springer Nature journal article supplement (doi:10.1007/s10567-011-0100-9), 2011-11-11
Supplement: MOESM2 [file 525160]

**Table 4: Selective Prevention Programs**

| **Name of Program,**  **Source** | **Overall Program Description**  **including setting, target**  **population, format** | **Family Support**  **Components** | **Study design**  **& Sample** | **Outcomes** |
| --- | --- | --- | --- | --- |
| 1. **Child Anxiety Prevention Study (Coping and Promoting Strength; CAPS)**  **Sources:**  http://www.hopkinsmedicine.org/psychiatry/specialty_areas/child_adolescent/research/CAPS/  Ginsburg (2004)  Ginsburg (2009)  **Study Sources:**  **Study #1:**  Ginsburg (2009) | **Program Delivery:** Based out of John Hopkins School of Medicine, Department of Psychiatry and Behavioral Sciences  **Target Population:**  Targeting children between 7 and 12 years of age whose parents have problems with anxiety, and their families.  **Goals:** To prevent anxiety disorders among children of parents who are themselves experiencing symptoms of anxiety or have a diagnosis.  **Program Focus:** CAPS, which is based upon CBT principles and Beardslee’s (1992, 1993) clinician-based intervention for children of parents with depression, teaches parents and children strategies for decreasing symptoms of anxiety.  CAPS is an eight-week program, 60 minutes per session; parents are seen alone for the first two sessions; subsequent sessions involve all family members. Three monthly booster sessions are also offered to families.  Delivered by professionals (psychologists) although the developer notes this program can also be delivered by teachers or paraprofessionals. | **Informational:** Education about anxiety and treatment.  **Instructional:** Coping strategies and techniques to reduce anxiety, problem solving and communication skills; parenting strategies pertaining to decreasing child’s anxiety (e.g. providing positive reinforcement for courageous behavior). | **Study #1: RCT** 40 children and their families were randomly assigned to CAPS or WLC. Pre/post/ 12 month post-intervention follow-up. | **Child:** By 1 year follow-up, 30% of the WLC group was diagnosed with anxiety, compared to 0% of youth in the CAPS group. Parent and evaluator reports of child’s anxiety decreased significantly from pre to 1 year follow-up among the CAPS group, but not the WLC group.  **Parent:** High satisfaction with services. |
| 2. **Children in the Middle (CIM)**  **Sources:**  http://www.nrepp.samhsa.gov/ViewIntervention.aspx?id=5  Brandon (2004)  Gillard & Seymor (2005)  Kramer et al. (1998)  **Study Sources:**  **Study #1:** Kramer et al. (1998)  **Study #2:** Brandon (2004)  **Study #3:** Gillard & Seymor (2005) | **Program Delivery:** Multiple venues (e.g. social service and mental health agencies, schools, court setting).  **Target Population:** Targeting children 3-15 years of age whose parents who are undergoing a divorce, and their families.  **Goals:** To decrease child’s risk of stress and mental health difficulties (e.g. behavioral problems, anxiety, problems at school) by reducing family discord.  **Program Focus:** CIM aims to reduce risk to children of divorcing parents through the provision of knowledge about the impact of divorce on children and parenting techniques. Parents may be mandated to CIM as part of divorce proceedings.  Commonly delivered by mental health professionals, but developers emphasize that program deliverers do not need to have any particular expertise to deliver CIM. In one study (Gillard & Seymor, 2005), groups facilitated by a psychologist and a lawyer.  CIM consists of either one or two group classes (90-120 minutes in length). Has also been adapted for online viewing. Parents view a video about how children may get put in the middle of their parents’ disputes, and receive booklets about how to reduce risk to the child and to encourage practice of skills. Children are in a separate program in which they watch a 30-minute video to combat self-blame, decrease myths (e.g. that the child can get the parents back together again), and teach problem solving, stress, and anger management skills. | **Information:** Booklets about the impact of parental discord on child;  **Instructional:** Parenting techniques, communication skills. | According to the CIM handout, eight studies have been conducted of CIM or its components; three used random designs.  **Study #1:** Families were assigned to Families First, CIM, or a control group (not stated whether groups were randomly assigned). Three month follow-up.  **Study #2:** Random sample of 345 participants (other condition not stated). 9 month follow-up.  **Study #3:** Subset of individuals in a larger project testing CIM. Pre/post study with parents in nine groups. Followed three to four months post-test. Three months post-program, 7 stakeholders and 20 participants provided additional information to confirm results from the data analysis. | **Child:** No impact of either treatment upon child behavior problems. Both programs were associated with reduced exposure to conflict in comparison to the control group.    **Parent:** No impact of either program upon parent conflict. CIM was associated with positive impact on communication skills.  **Other:** No impact of treatment groups (CIM and Families First upon domestic violence during follow-up. All groups showed decrease.  **Parent:** CIM associated with reductions in interjecting child in the parents’ disputes, although, conflict increased among parents.  **Child:** Improvement in child behavior from pre to post, maintained at follow-up.  **Parent:** Enhanced knowledge about how separation impacts children; reduced conflict between parents at follow-up; high parent satisfaction. |
| **3. Children of Divorce Intervention Program (CODIP)**  **Sources:**  http://www.childrensinstitute.net/programs/codip  http://www.childtrends.org/lifecourse/programs/ChildrenofDivorceInterventionProgram.htm  Wolchik et al. (1993)  **Study Sources:**  **Study #1:** Wolchik et al. (1993) | **Program Delivery:** School-based setting.  **Target Population:** Targeting children of parents who are either separated or divorced., and their families. Additional studies have delivered CODIP to adolescents up to 15 years of age (Wolchik et al., 1993).  **Goals:** To help children cope and adjust to their parents’ divorce.  **Program Focus:** CODIP is a skills-based program delivered by mental health professionals or professionals in training (e.g. graduate students).  Program sessions range between 12 and 15; within the 12 session format, 10 are group sessions, interspersed with two individual sessions after the third and sixth sessions.  Different programmatic materials offered depending on the child’s age: K-1st grade, 2nd-3rd graders, 4th-6th graders, and 7th-8th graders. Children’s component encourages peer support and coping skills, decreased blame, and positive self and family perceptions  Delivered by a professional team. | **Informational:**  Provision of information about the importance of spending time with their child and the father/child relationship.  **Instructional:** Parenting techniques, anger management and listening skills. | **Study #1: RCT.** 70 divorced mothers were randomized to receive CODIP or delayed treatment. | **Child:** Children in CODIP evidenced reduced aggression compared to the control group, but did not differ from control on depression, anxiety or conduct disorder.  **Parent:** Parents in CODIP showed better use of discipline and decreased negative events pertaining to the divorce. Effects were strongest for families who had the worst levels of functioning at pretest, and based on the mother’s self-report versus the child.  **Other:** The CODIP group evidenced a higher quality of the parent/child relationship. |
| **4. Dads for Life (DFL)**  **Sources:** http://prc.asu.edu/Projects/DFL  Cookston et al. (2006)  **Study Sources:**  **Study #1:**  Cookston et al. (2006) | **Program Delivery:** Not stated-affiliated with Arizona State University.  **Target Population:** Targeting noncustodial fathers of children between 4 and 12 years of age.  **Goals:** To reduce risks to the child’s well-being through facilitating amicable and concordant relations regarding parenting after divorce.  **Program Focus:** Dads for Life is a skills-based program that aims to reduce risks to children associated with divorce (e.g. decreasing parents’ conflict, building parenting skills). DFL was developed as the counterpart to the New Beginnings Program (e.g. Wolchik et al., 2009)  Total of 10 sessions; eight sessions lasting 1 hour, 45 minutes per session delivered in a group format, and the remaining two (45 minutes each) were delivered on an individual basis. The child is not directly seen.  Professionally-delivered team (one male and one female per team, at the master’s degree level). | **Instructional:**  Parenting techniques (e.g. listening skills, providing effective discipline). | **Study #1:** Random assignment of 127 fathers to DFL and 87 fathers to a control group (self-help books) 1 year follow-up. | **Parent:** Both parents of fathers in the DFL group reported decreased conflict in comparison to the control group; no change over time in fathers’ perceptions of co-parenting across groups over time; perceptions of support decreased over time among mothers whose ex-spouses were in the control group, while mothers whose ex-spouses participated in DFL reported significantly improved co-parenting. |

| **5. Empowerment Zone (EZ)**  **Sources:**  Nabors et al. (2001)  Nabors et al. (2004)  **Study Sources:**  **Study #1:**  Nabors et al. (2001)  **Study #2:**  Nabors et al. (2004) | **Program Delivery:** Varies: schools, homeless shelters.  **Target Population:** Targeting grade school-aged children and their families who are homeless or of low socioeconomic status.    **Goals:** To encourage healthy development and improve the parent/child relationship.  **Program Focus:** EZ is a skills-based, parent training program for reducing mental health difficulties high-risk youth: children who are homeless or living in poverty.  Eight group sessions with parents. Child receives a summer camp that focuses on academics (e.g. reading and writing), art, dance, cultural field trips. In Nabor et al.’s (2004) paper, youth were given additional information (e.g. about ways to decrease stress, violence prevention, risks associated with cigarette and illicit substance use, and ways to boost self-esteem).    Delivered by a mental health professional team (e.g. psychologists, social workers). | **Instructional:**  Parenting strategies, strategies to encourage the child’s healthy development (e.g. social skills, problem solving and anger management skills); techniques to enhance parents’ involvement in their child’s education | **Study #1: Pilot study:** 33 children from grade school and 20 children from shelters received EZ.  **Study #2:** 45 youth who attended the camp completed assessments during the camp’s second and third week. | **Child:** Regarding the summer program: Parent reports found child behavior improved from pre to post, and reported shelter-dwelling children evidenced higher grades than elementary school children. However, teacher reports showed decreased social skills across sample.  Regarding the group and classroom components: Children reported high satisfaction with program.  **Parent:** Parents reporting learning different strategies to manage their parenting and their child’s behavior.  **Other:** Teacher satisfaction high (for the classroom and circle-time components).  **Child:** High satisfaction with classroom and small group components.  **Other:** Teacher satisfaction high with the classroom component.  Children who were homeless were less likely to see the same health provider on a regular basis and received less services than youth from low income families. |
| --- | --- | --- | --- | --- |

| **6. Family Bereavement Program (FBP)**  **Sources:**  www.childtrends.org/lifecourse/programs/fbp.htm  Luecken et al. (2009)  Sandler et al. (2003)  Sandler et al. (2010)  **Study Sources:**  **Study #1:** Sandler et al. (2003)  **Study #2:** Sandler et al. (2010)  **Study #3:** Luecken et al. (2009) | **Program Delivery:** Not specifically stated: program affiliated with the Arizona State University.  **Target Population:** Targets families of children between 8 and 16 years of age whose caregiver or parent died within the past 2 ½ years.  **Goals:** To improve child’s self-esteem and mental health as they cope with their parent’s death.  **Program Focus:** Caregivers, children and adolescents participate in separate groups for eight sessions, two hours in length per session, and four conjoint sessions. Families also participate in two individual sessions that focus on reviewing the family’s use of skills learned in sessions.  Delivered by mental health professionals at the master’s or doctoral level; groups are co-led. | **Informational:** Provision of information about grief.  **Instructional:** Parenting techniques, strategies to decrease negative cognitions. | **Study #1: RCT.** 156 families (244 youth) randomized to either FBP or a control group (self study). 11- month follow-up.  **Study #2:** Same sample as Sandler et al. (2003), six year follow-up.  **Study #3:** Same sample as Sandler et al. (2003): 139 children were randomly assigned to FBP or control group. Evaluated Evaluated six years post-intervention (comparison in scores prior and after a conflict task). | **Child:** Children in the FBP group evidenced improved coping skills and positive affect in comparison to the control group; FBP was not associated with self-esteem, negative cognitions regarding negative or stressful events at posttest. At follow-up, only girls and youth who evidenced greater difficulties at pretest who were in the FBP group evidenced reductions in internalizing and externalizing behaviors.  **Parent:** Parents in the FBP group evidenced improvements in their mental health, parenting, and coping skills at posttest; at follow-up, parents in the FBP group evidenced improvements in parenting, but no improvements in mental health.  **Other:** FBP was associated with a decreased negative cognitions about stressful events from pre to posttest.  **Child:** Children in the FBP condition evidenced greater decreases in problematic grief at both posttest and six-year follow-up compared to children in the control group.  **Child:** Children who received FBP evidenced higher levels of cortisol in comparison to the control group. |
| --- | --- | --- | --- | --- |
| **7. Keeping Families Strong (KFS)**  **Source:**  http://magazine.jhsph.edu/2006/Fall/news_briefs/depression/?subsection_id=50  Riley et al. (2008).  **Study Sources:**  **Study #1:**  Riley et al. (2008). | **Program Delivery:** Delivered in adult mental health settings (where the parent is receiving treatment).  **Target Population:** Targeting children ages 8 and older of mothers who have depression, and their families.  **Goals:** To teach families about the impact of depression; to enhance coping and communication skills.    **Program Focus:** Separate groups for children and parents; 10 weekly sessions, 90 minutes each, plus two booster sessions. Parent classes focus on improving parenting skills and sharing their experiences with depression. Child group aims to build coping, problem-solving, and communication skills.  Delivered by mental health professionals. | **Information:** Education about the impact of depression upon family and “how it can contribute to problems.”  **Instructional:** Parenting techniques (e.g. discipline), communication and problem solving skills.  **Emotional:** Group format is specifically chosen to encourage social support. | **Study #1:** Four **pilot studies** involving 13 parents and 15 children. Two sites. Pre/post.  A large, multi-site study is being planned | **Child:** Significant reductions in symptoms from pre to posttest; improved coping and decreased stressful events.  **Parent:** Reductions in mental health difficulties (depression, anxiety, somatic symptoms) was moderate to large; small decrease in stressful events. No impact upon parenting skills (monitoring, supervision, consistency). Satisfaction was good to very good.  **Other:** Improved involvement in family activities (meals, chores), although small; large improvements in closeness between family members. |
| **8. Metropolitan Area Child Study Research Group (MACS)**  **Sources:**  <http://www.childtrends.org/lifecourse/programs/metro.htm>  Tolan & McKay (1996)  MACS Group (2002)  MACS Group (2007)  **Study Sources:**  **Study #1:**  MACS Group (2002) | **Program Delivery:** School setting.  **Target Population:** Targeting inner-city children of color between 7 and 13 at elevated risk for conduct problems and their families.  **Goals:** To decrease risk of aggression, particularly among youth from disadvantaged communities.  **Program Focus:**  Three different components: 1) a classroom curriculum called “Yes I Can” that aims to enhance problem solving skills, decrease aggression, and help children understand the peers feelings. Delivered over two years. 2) Small groups for children to discuss peer relationships and build problem solving skills; 3) A family intervention consisting of multiple family group and individual family meetings delivered once a week over 22 weeks. Individual family meetings are 1 hour in duration; groups meet for 1 ½ hours.    Delivered by professionals (clinicians, graduate students) | **Informational:** Information about improving family functioning.  **Instructional:** Parenting strategies (e.g. discipline, consistency, monitoring)  **Emotional:** Parents are encouraged to form support networks -many continue meeting in the service of providing support. And provision of emotional support is a key component of the program.  **Advocacy:** Families are helped to advocate for their child within the educational system. | **Study #1:** 16 schools (1500 youth) were randomly assigned to a) no treatment, b) the classroom curriculum, c) classroom curriculum plus the small groups, or d) all of these components plus the family intervention. | **Child:**  No impact of the intervention upon aggression. Effects of program were uneven across schools, depending on resources and the type of treatment received (i.e. classroom component alone versus classroom component plus small groups). Academic achievement was unaffected by the intervention among children who received the intervention either in grades 5-6 or both grades 1-4 and 5-6; in contrast, children who received the classroom component only evidenced improvements in academic achievement in comparison to the control group. |
| **9. Montreal Longitudinal Study/Preventive Treatment Program**  **Sources:**  http://www.surgeongeneral.gov/library/youthviolence/chapter5/appendix5b.html#MontrealLongitudinal  http://www.childtrends.org/lifecourse/programs/MontrealPrevention.htm  Pagani et al. (1999)  Tremblay et al. (1991)  **Study Sources:**  **Study #1:** Tremblay et al. (1991)  **Study #2:** Additional studies as reported by http://www.childtrends.org/lifecourse/programs/MontrealPrevention.htm | **Program Delivery:** Home and school settings. Parent component delivered in the home; child component delivered at school.  **Target Population:** Targeting kindergarten boys of low socioeconomic status and their families.  **Goals:** To decrease future conduct problems among elementary-aged boys exhibiting maladaptive behaviors.  **Program Focus:** This prevention program is based on PMT-O (e.g., Patterson et al., 2004)and LIFT (e.g. Eddy et al., 2000). Parents and children seen separately; number of sessions determined by caseworkers’ assessment of severity. Parent component aims to build parenting skills; child component, which is group based, teaches child anger management skills, prosocial behaviors, and remaining in control.  Delivered by professional caseworkers, defined as psychologists and social workers. | **Instructional:** Parenting strategies (reinforcing positive behavior, consistent, appropriate punishment). | **Study #1:** **RCT.** 319 youth at risk for antisocial behavior were randomized to the intervention condition or two non-treatment groups. 3 year follow-up (1987-1989).  **Study #2:** According to http://www.childtrends.org/lifecourse/programs/MontrealPrevention.htm, three additional studies have been conducted that measured outcomes: McCord et al. (1994), a RCT (youth were followed up for six post-assessments); Tremblay et al. (1995) and Tremblay et al. (1996), both of which are follow-ups of McCord’s study. | **Child:** According to teacher reports, no statistically significant differences between groups regarding externalizing and internalizing behaviors or prosocial behaviors. Slight improvements which emerged among youth in treatment group regarding hyperactivity and fighting with others was no longer apparent by the end of the follow-up period. Mothers rated the children in the treatment group as having greater problems regarding disruptive behaviors and inattentiveness in comparison to mothers of children in the control group at posttest. By the end of follow-up, these differences were negligible. Mothers of children in the treatment group also rated youth as lower in prosocial behavior at the three year follow-up period.    Peer ratings: youth in the treatment group were not as withdrawn as the other groups at posttest; by the end of follow up, differences between the groups were negligible. Self-report: no discernible differences between groups in 1988 regarding maladaptive behaviors; at the end of the follow-up period, boys in the treatment group were less likely to have engaged in fighting both in and outside of the home, and evidenced lower rates of stealing.  **Other:** Marginal differences between the numbers of boys in the treatment group (n=17) who were placed in special classrooms than boys in the control group (n=21); however, over twice as many boys in the observational group (46 boys) were either held back or placed in a special classroom in comparison to the treatment group. Further, greater numbers of untreated youth (43.4%) who had either been held back or were in special classrooms were rated as having elevated disruptive behaviors (according to teacher or peer report) in comparison to 23.3% of treatment youth.  **Child:** Results found children in the treatment group fared better over time regarding classroom placements, gang involvement, substance use and maladaptive behaviors, although some findings failed to show significant differences between groups, and findings were inconsistent across studies (e.g. treatment youth were less likely to engage in maladaptive behaviors as found by McCord et al. (1994),although differences between groups were not significant. In a second study, however, delinquency did not decrease among treatment youth over time (Tremblay, 1995). |
| 10. **New Beginnings Program (NBP)**  **Sources:**  http://www.nrepp.samhsa.gov/ViewIntervention.aspx?id=27  Hipke et al. (2002)  Wolchik et al. (2002)  Wolchik et al. (2009)  **Study Sources:**  **Study #1:**  Wolchik et al. (2002)  **Study #2:**  Wolchik et al. (2009) | **Program Delivery:**  University setting: Affiliated with Arizona State University  **Target Population:** Targeting children between 3 and 17 years of age of divorced parents, and their families.  **Goals:** To encourage healthy development after divorce.  **Program Focus:** NBP aims to alter risk factors and encourage protective factors to child’s adjustment through the provision of information and skill-building for parents;  Children and parents are in separate, concurrent groups. Child’s group lasts 11 sessions, parent’s group include 10 group sessions and two individual sessions interspersed after the third and sixth sessions.    Each group is co-led by professionals | **Information:** Education about divorce and its impact upon the child.  **Instructional:** Parenting strategies (e.g. discipline, monitoring behavior, providing consequences), listening, relationship, and anger management skills. | **Study #1: RCT.** 218 families randomly assigned to either NBP (for parents only), NBP (for both parents and child), or a control condition (books). Six-year follow-up  **Study #2:** Two **RCTs**; 1) 70 children assigned to NBP (parent only, parent and child) vs WLC, 2) 240 families; replicated the first study and examined whether outcomes were maintained over time. | **Child:** No significant difference between the parent alone condition and the parent and child condition. In comparison to the control condition, fewer adolescents in the parent plus child condition evidenced a diagnosable mental health disorder, and these youth had lower numbers of sexual partners.  **Child:** The child component did not offer any additive benefits regarding mental health status.    **Parent:** NBP was associated with a higher quality of parenting (e.g. use of effective discipline, quality of relationship between mother and child).  Program effects were strongest for most outcomes among families who had highest risk levels at pretest.    A 15 year follow-up study is underway; additionally, several studies of moderators and mediators have been conducted. |
| 11. **Parent Management Training-Oregon (PMT-O)**  **Sources:**  http://www.childtrends.org/Lifecourse/programs/oslc.htm,  Patterson et al. (1982)  DeGarmo et al. (2004)  Patterson et al. (2004)  **Study Sources:**  **Study #1:**  Patterson et al. (1982)  **Study #2:**  DeGarmo et al. (2004)  **Study #3:**  Patterson et al. (2004) | **Program Delivery:** The Oregon Social Learning Center  **Target Population:** Targeting parents of children 3-12 years of age who are exhibiting problem behaviors and their families.  **Goals:** To decrease problem behaviors among youth through the provision of parenting skills.  **Program Focus:** Parents participate in as many sessions as needed; child not directly seen. In recent adaptations (e.g. Degarmo et al., 2004; Patterson et al., 2004), parents participated in 14 sessions. Offered in both individual sessions (Patterson et al. 1982) and group (DeGarmo et al., Patterson et al.)  Delivered by mental health professionals (psychologists, psychiatrist). | **Instructional:** Parenting strategies (e.g. monitoring, effective discipline). DeGarmo et al. (2004) and Patterson et al. (2004) also included skill building to manage emotions and conflict with others. | **Study #1: RCT:** 19 children with problem behaviors were randomized to PMT or a wait list comparison group (comparison group was offered community-based treatment).  **Study #2: RCT:** 238 sons and mothers who recently separated from their partners were randomized to PMT (2/3rds) or a comparison group (1/3rd). 30-month follow-up.  **Study #3:** Same sample as Study #2 | **Child:** Children receiving PMT-O evidenced significantly greater reductions in problem behaviors in comparison to the control group.      **Child:** Youth receiving PMT-Oevidenced decreases in both internalizing and externalizing problems over time.  **Parent:** Moderate effect sizes for parenting over time among mothers in the experimental group; mothers who received PMT-O evidenced improvement in maternal depression at 30 months.  Also conducted meditational analyses of child’s behavioral problems.  **Child:** Children in the experimental group evidenced a decrease in problem behaviors, while youth in the control group evidenced an increase in problem behavior over 30 months.  **Parent:** Maternal depression significantly decreased over time among mothers in the experimental group, while showing variability in the control group.  Also examined mediators affecting child outcomes and maternal depression. |
| **12. Parent Training**  **Source:** Garvey et al. (2006)  **Study Sources:**  **Study #1:**  Garvey et al. (2006). | **Program Delivery:** Day care center.  **Target Population:** Targeting families of children between two and four years of age; identified as being at risk based upon low-income status.  **Goals:** To strengthen parenting practices among low-income families to reduce behavioral problems among young children.  **Program Focus:** Parent Training is part of a larger program, the Chicago Parent Program. Eleven, two-hours group sessions in which parents view and discuss videos depicting parent/child interactions. One booster session offered two months after the last group session. Child not directly seen.  Delivered by team of professionals | **Instructional:** Parenting techniques.  **Instrumental:** Childcare, dinner, reimbursement for transportation. | **Study #1: RCT** Matched groups of parents at seven day care facilities: 292 parents were randomly assigned to either the intervention or WLC. | Assessed child and parent outcomes (e.g. child behavior, parenting self-efficacy) as mediated by attending services. |
| 13. **Preventive Intervention Project (Clinician Based Cognitive Psychoeducational Intervention for Families).**  **Sources:**  http://www.nrepp.samhsa.gov/ViewIntervention.aspx?id=156  http://www.childtrends.org/lifecourse/programs/clinician.htm  Beardslee et al. (2002)  **Study Sources:**  **Study #1:**  Beardslee et al. (2002)  **Study #2:**  Beardslee et al. (2003)  **Study #3:**  Beardslee et al. (2007) | **Program Delivery:** Both home and community settings.  **Target Population:**  Targeting children 8 to 15 years of age who are identified as at risk because one or both parents have depression, and their families.  **Goals:** To enhance youth’s knowledge of and attitudes about their parent’s depression, which is turn aids in self-understanding and decreases the child’s risk for depression.    **Program Focus:** The focus of this program is to provide information about mood disorders and help parents communicate with their children about their mental health difficulties.  Intervention consists of between 6-11 sessions.  Delivered by professionals (e.g., social workers, nurses, psychologists). | **Informational:** Education about mood disorders, risks to children.    **Instructional:** Communication skillsto enable parents to discuss their mental health difficulties with their child. | **Study #1:** 2/3rds of families were assigned to the intervention arm, and 1/3rd to a comparison group (lecture). The first 14 families were studied.    **Study #2: RCT**. 93 families (121 children) were randomly assigned to either the intervention or a comparison condition (lecture). 1 and 2.5 years follow-up.  **Study #3: RCT.** 105 families randomized to the intervention or lectures. Assessed up to 4.5 years post enrollment. | **Parent:** Satisfaction was moderate to high; majority of parents (10 out of 14) reported at least five changes in attitude regarding how they discussed the illness and knowledge about mood disorders.  **Child:** Parents in both groups reported changes in their child’s behavior and attitudes; more change was evident in the experimental group.  Both conditions associated with increased understanding of mood disorders over time, and internalizing problems decreased across groups over time.    **Child:** Intervention group evidenced greater improvements in behavior and attitudes, and understanding of mental illness; No significant difference between groups on internalizing symptoms, which decreased for both groups, or functioning, which increased.  **Other:** Both groups reported improvements in family functioning; no significant difference between groups. |
| 14. **Protecting Families Program**  **Sources:**  Boyd et al. (2006)  Personal communication with R. Boyd 9/14  **Study Sources:**  None-evaluation data currently being analyzed. | **Program Delivery:** Community mental health clinics where parent is receiving treatment.  **Target Population:** Targeting urban school-aged youth from low income communities whose mothers are in treatment for depression, and their families.  **Goals:** To reduce the risk of maternal depression upon child’s mental health.  **Program Focus:** Children and parents are in separate, concurrent groups. Parent groups focus on psychoeducation and parenting skills. Child group is the Penn Optimism Program (POP), which teaches CBT skills (e.g. cognitive restructuring, coping skills). Family meetings are also offered as a forum to discuss how parental depression impacts the family.    Delivered by professionals (teams co-lead the child and parent groups). | **Informational:** Education about depression and its effect upon the child.  **Instructional:**  Parenting skills (e.g. effective discipline, monitoring, reducing conflict with child).  **Emotional:** Meal is to build support.  **Instrumental:** Community meal. | **Study #1:** No published data available |  |
| 15. **SAFEChildren**  **Sources:**  [www.childtrends.org/lifecourse/programs/SafeChildren.htm](http://www.childtrends.org/lifecourse/programs/SafeChildren.htm)  www.psych.uic.edu/fcrg/safe.htm  Gorman-Smith et al. (2002)  Tolan et al. (2004)  **Study Sources:**  **Study #1:**  Tolan et al. (2004) | **Program Delivery:** Delivered in school setting.  **Target Population:** Targeting children in the first grade and their families.  **Goals:** To counteract risk factors in low-income communities.  **Program Focus:**  Two components: a reading and tutoring program for youth offered twice a week for 30 minutes each, and multiple family group sessions offered once a week over the course of 22 weeks.  Delivered by professionals. | **Informational:** Educational topics in areas such as helping their child succeed in school, and child development.  **Instructional:** Parenting strategies  **Emotional:** Multiple family group structure encourages support network among parents.  **Advocacy:** Assists parents in advocating for their child. | **Study #1: RCT**: 2,400 children entering first grade who resided in low-income, inner-city communities were randomly assigned to SAFEChildren or a control group.  Six-months follow-up. | **Child:** Children in the intervention group evidenced significant improvements in academic performance at follow-up in comparison to the control group; no significant differences between groups regarding bonding, child behavior, or social functioning. Additional program benefits for high risk children regarding behavior problems and social functioning.  **Parent:** The intervention group evidenced stable involvement in their child’s education, while the control group’s participation waned over time. No additional benefits of intervention group were found regarding parenting or family processes. High-risk families evidenced benefits in monitoring. |
